# Supplementary material
Source: Springer Nature journal article supplement (https://www.springermedizin.de/resource/supplementary/12885_2009_1836_MOESM6_ESM.pdf/9460674)

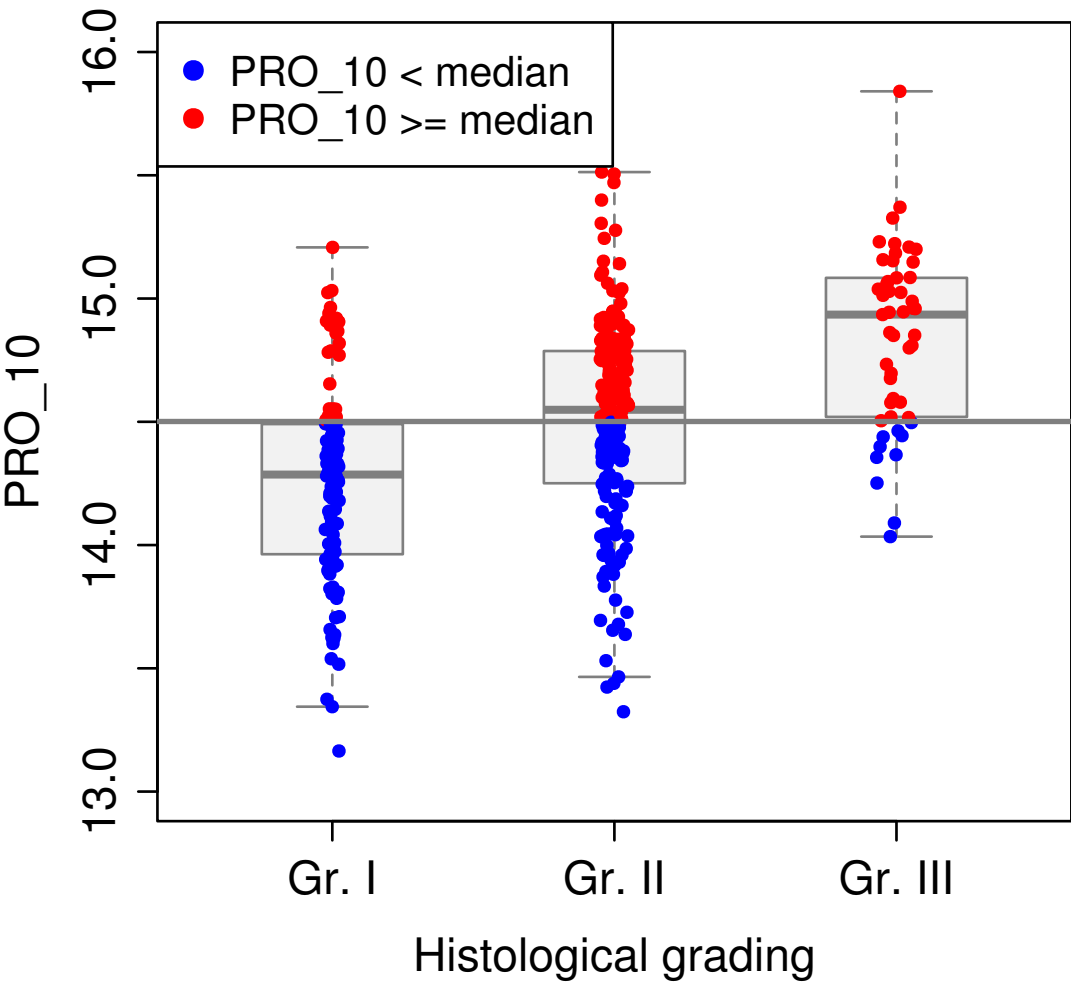

Supplement: MOESM6 [file 9460674]
